# Supplementary material for: Meat Quality Parameters and Sensory Properties of One High-Performing and Two Local Chicken Breeds Fed with Vicia faba
Source: MDPI journal article supplement (doi:10.3390/foods9081052), 2020-08-04
Supplement: s1 [file s1]

# Meat quality parameters and sensory properties of two local and one high performing chicken breeds fed with *Vicia faba*.

Cynthia I. Escobedo del Bosque, Brianne A. Altmann, Marco Ciulu, Ingrid Halle, Simon Jansen, Tanja Nolte, Henner Simianer, Steffen Weigend, Daniel Mörlein

## Supplementary Materials

**Table S1.** Sensory estimated marginal mean attribute scores (standard error) and mixed model statistics (n=10, r=3) for all Bresse Gauloise breast samples per feed (C=control, VC+ = high in vicin, VC= low in vicin) group.

| Attribute    | Feed               |                   |                   | SEM  | Feed effect |
|--------------|--------------------|-------------------|-------------------|------|-------------|
|              | C                  | VC+               | VC-               |      | p value     |
| Aroma        |                    |                   |                   |      |             |
| Overall      | 65.0               | 64.6              | 65.2              | 3.29 | 0.959       |
| Barn         | 17.6               | 18.8              | 20.7              | 2.30 | 0.147       |
| Metallic     | 11.8               | 11.5              | 12.9              | 1.50 | 0.454       |
| Chicken      | 46.9               | 50.1              | 51.9              | 2.56 | 0.138       |
| Appearance   |                    |                   |                   |      |             |
| Color        | 19.2               | 21.7              | 21.7              | 2.86 | 0.198       |
| Fibrousness  | 42.3 <sup>ab</sup> | 37.8 <sup>a</sup> | 43.2 <sup>b</sup> | 6.63 | 0.097       |
| Moisture     | 48.7               | 53.5              | 50.7              | 5.46 | 0.578       |
| Flavor       |                    |                   |                   |      |             |
| Overall      | 56.7               | 57.6              | 58.8              | 3.39 | 0.729       |
| Sweet        | 17.4               | 20.9              | 19.4              | 2.20 | 0.213       |
| Sour         | 27.7               | 24.1              | 27.1              | 3.23 | 0.597       |
| Salty        | 16.5               | 15.6              | 16.4              | 2.62 | 0.724       |
| Bitter       | 9.7                | 9.5               | 10.1              | 2.62 | 0.936       |
| Umami        | 20.5               | 22.1              | 25.2              | 3.32 | 0.184       |
| Chicken      | 48.1               | 48.6              | 48.2              | 4.20 | 0.953       |
| Metallic     | 15.7               | 16.6              | 16.5              | 2.78 | 0.739       |
| Aftertaste   | 28.8               | 31.8              | 31.6              | 3.45 | 0.362       |
| Texture      |                    |                   |                   |      |             |
| Firmness     | 40.2               | 41.1              | 43.7              | 5.42 | 0.466       |
| Juiciness    | 47.4               | 50.9              | 45.4              | 5.55 | 0.362       |
| Cohesiveness | 47.1               | 51.1              | 48.7              | 6.12 | 0.602       |
| Tenderness   | 71.0               | 70.1              | 66.6              | 3.55 | 0.448       |
| Crumbliness  | 56.4               | 58.7              | 54.7              | 4.89 | 0.428       |

Mixed model: fixed effect feedstuff, random effects panelist, animal, feedstuff\*panelist, feedstuff\*animal

<sup>a,b</sup> Means followed by differing superscript letters are statistically significantly different ( $\alpha=0.05$ ).

**Table S2.** Sensory estimated marginal mean attribute scores (standard error) and mixed model statistics (n=10, r=3) for all Vorwerkhuhn breast samples per feed (C=control, VC+ = high in vicin, VC-= low in vicin) group.

| Attribute    | Feed               |                   |                   | SEM  | Feed effect |
|--------------|--------------------|-------------------|-------------------|------|-------------|
|              | C                  | VC+               | VC-               |      | p value     |
| Aroma        |                    |                   |                   |      |             |
| Overall      | 62.8               | 64.2              | 61.3              | 4.12 | 0.430       |
| Barn         | 20.0 <sup>ab</sup> | 21.5 <sup>a</sup> | 17.4 <sup>b</sup> | 2.35 | 0.026       |
| Metallic     | 13.8               | 12.8              | 12.3              | 1.71 | 0.483       |
| Chicken      | 49.6               | 45.5              | 48.2              | 3.54 | 0.623       |
| Appearance   |                    |                   |                   |      |             |
| Color        | 23.7               | 23.0              | 22.4              | 2.95 | 0.831       |
| Fibrousness  | 45.0               | 40.9              | 43.7              | 7.03 | 0.631       |
| Moisture     | 49.7               | 52.9              | 57.8              | 6.37 | 0.404       |
| Flavor       |                    |                   |                   |      |             |
| Overall      | 58.0               | 58.8              | 59.4              | 3.71 | 0.918       |
| Sweet        | 20.7               | 20.3              | 19.7              | 2.05 | 0.844       |
| Sour         | 28.9               | 26.5              | 28.6              | 2.66 | 0.679       |
| Salty        | 15.9               | 15.7              | 17.0              | 2.72 | 0.447       |
| Bitter       | 11.4               | 9.7               | 11.1              | 3.20 | 0.535       |
| Umami        | 22.3               | 24.5              | 24.1              | 3.78 | 0.461       |
| Chicken      | 46.5               | 49.6              | 47.7              | 4.44 | 0.264       |
| Metallic     | 15.3               | 15.5              | 17.3              | 2.66 | 0.433       |
| Aftertaste   | 31.8               | 32.4              | 32.0              | 4.30 | 0.968       |
| Texture      |                    |                   |                   |      |             |
| Firmness     | 46.8               | 49.6              | 48.9              | 4.96 | 0.718       |
| Juiciness    | 48.7               | 44.5              | 51.1              | 4.85 | 0.273       |
| Cohesiveness | 51.0               | 45.6              | 52.9              | 6.57 | 0.305       |
| Tenderness   | 61.7 <sup>ab</sup> | 60.1 <sup>a</sup> | 68.4 <sup>b</sup> | 4.27 | 0.066       |
| Crumbliness  | 55.2               | 56.2              | 60.9              | 5.02 | 0.132       |

Mixed model: fixed effect feedstuff, random effects panelist, animal, feedstuff\*panelist, feedstuff\*animal <sup>a,b</sup> Means followed by differing superscript letters are statistically significantly different ( $\alpha=0.05$ ).

**Table S3.** Sensory estimated marginal mean attribute scores (standard error) and mixed model statistics (n=10, r=3) for all White Rock breast samples per feed (C=control, VC+ = high in vicin, VC-= low in vicin) group.

| Attribute   | Feed |      |      | SEM  | Feed effect |
|-------------|------|------|------|------|-------------|
|             | C    | VC+  | VC-  |      | p value     |
| Aroma       |      |      |      |      |             |
| Overall     | 64.7 | 65.8 | 63.9 | 3.77 | 0.801       |
| Barn        | 19.7 | 22.7 | 19.4 | 2.36 | 0.124       |
| Metallic    | 12.3 | 12.7 | 12.9 | 1.76 | 0.898       |
| Chicken     | 50.2 | 51.0 | 52.0 | 3.48 | 0.814       |
| Appearance  |      |      |      |      |             |
| Color       | 20.1 | 20.9 | 22.2 | 2.72 | 0.461       |
| Fibrousness | 44.6 | 39.1 | 41.8 | 6.94 | 0.143       |
| Moisture    | 57.1 | 59.6 | 57.3 | 5.60 | 0.623       |
| Flavor      |      |      |      |      |             |
| Overall     | 59.5 | 56.9 | 55.6 | 3.37 | 0.240       |
| Sweet       | 20.8 | 18.5 | 19.2 | 2.30 | 0.497       |

|              |                   |                    |                   |      |       |
|--------------|-------------------|--------------------|-------------------|------|-------|
| Sour         | 25.5              | 27.0               | 22.7              | 3.39 | 0.471 |
| Salty        | 16.4              | 16.2               | 16.3              | 2.48 | 0.983 |
| Bitter       | 10.5              | 9.7                | 10.3              | 2.81 | 0.869 |
| Umami        | 21.3              | 20.9               | 20.10             | 2.82 | 0.744 |
| Chicken      | 48.3              | 48.1               | 46.2              | 4.12 | 0.579 |
| Metallic     | 16.3              | 15.1               | 15.1              | 2.49 | 0.564 |
| Aftertaste   | 30.1              | 30.1               | 29.2              | 3.54 | 0.861 |
| Texture      |                   |                    |                   |      |       |
| Firmness     | 45.2              | 48.2               | 46.5              | 5.21 | 0.743 |
| Juiciness    | 55.5              | 51.5               | 49.6              | 4.77 | 0.288 |
| Cohesiveness | 49.3              | 51.5               | 50.0              | 5.89 | 0.790 |
| Tenderness   | 70.7 <sup>a</sup> | 67.2 <sup>ab</sup> | 63.6 <sup>b</sup> | 3.19 | 0.104 |
| Crumbliness  | 54.8              | 51.6               | 57.8              | 5.13 | 0.286 |

Mixed model: fixed effect feedstuff, random effects panelist, animal, feedstuff\*panelist, feedstuff\*animal <sup>a,b</sup> Means followed by differing superscript letters are statistically significantly different ( $\alpha=0.05$ ).

**Table S4.** Sensory estimated marginal mean attribute scores (standard error) and mixed model statistics (n=10, r=2) for all Bresse Gauloise leg samples per feed (C=control, VC+ = high in vicin, VC- = low in vicin) group.

| Attribute        | Feed              |                   |                    | SEM  | Feed effect |
|------------------|-------------------|-------------------|--------------------|------|-------------|
|                  | C                 | VC+               | VC-                |      | p value     |
| Aroma            |                   |                   |                    |      |             |
| Overall          | 61.6              | 61.7              | 58.5               | 3.70 | 0.477       |
| Roasted          | 43.2              | 49.4              | 43.8               | 4.08 | 0.160       |
| Chicken          | 46.6              | 50.1              | 47.1               | 3.67 | 0.622       |
| Barn             | 19.3              | 14.3              | 13.6               | 2.82 | 0.249       |
| Metallic         | 11.5              | 11.0              | 9.6                | 2.23 | 0.358       |
| Appearance       |                   |                   |                    |      |             |
| Crust color      | 32.1              | 36.3              | 35.3               | 5.83 | 0.398       |
| Meat color       | 29.6              | 34.6              | 34.2               | 4.77 | 0.341       |
| Flavor           |                   |                   |                    |      |             |
| Overall          | 61.2              | 61.0              | 60.8               | 2.52 | 0.975       |
| Sweet            | 17.3              | 17.6              | 16.9               | 2.39 | 0.862       |
| Umami            | 25.3              | 27.1              | 25.9               | 3.01 | 0.544       |
| Chicken          | 58.3              | 57.2              | 57.0               | 2.89 | 0.761       |
| Roasted          | 41.9              | 42.6              | 42.6               | 3.72 | 0.963       |
| Greasy/oily      | 36.3              | 40.3              | 42.0               | 2.29 | 0.186       |
| Metallic         | 15.4              | 13.9              | 13.8               | 2.16 | 0.666       |
| Aftertaste       | 25.5              | 24.9              | 25.3               | 3.39 | 0.942       |
| Texture          |                   |                   |                    |      |             |
| Crispiness       | 21.6 <sup>a</sup> | 32.7 <sup>b</sup> | 35.4 <sup>bc</sup> | 5.91 | 0.024       |
| Firmness         | 34.5              | 32.9              | 34.0               | 5.27 | 0.886       |
| Juiciness        | 49.1              | 48.5              | 50.1               | 3.77 | 0.922       |
| Rubbery          | 25.9              | 22.6              | 22.1               | 3.18 | 0.228       |
| Greasy mouthfeel | 44.4              | 45.1              | 42.2               | 3.43 | 0.583       |

Mixed model: fixed effect feedstuff, random effects panelist, feedstuff\*panelist

<sup>a,b,c</sup> Means followed by differing superscript letters are statistically significantly different ( $\alpha=0.05$ ).

**Table S5.** Sensory estimated marginal mean attribute scores (standard error) and mixed model statistics (n=10, r=2) for all Vorwerkhuhn leg samples per feed (C=control, VC+ = high in vicin, VC- = low in vicin) group.

| Attribute        | Feed               |                    |                    | SEM  | Feed effect |
|------------------|--------------------|--------------------|--------------------|------|-------------|
|                  | C                  | VC+                | VC-                |      | p value     |
| Aroma            |                    |                    |                    |      |             |
| Overall          | 61.8               | 61.1               | 63.6               | 3.24 | 0.659       |
| Roasted          | 51.2               | 49.9               | 53.6               | 3.50 | 0.482       |
| Chicken          | 46.0               | 44.8               | 47.6               | 2.92 | 0.533       |
| Barn             | 10.7 <sup>a</sup>  | 14.6 <sup>b</sup>  | 12.3 <sup>ab</sup> | 2.52 | 0.106       |
| Metallic         | 10.0               | 10.0               | 11.6               | 2.14 | 0.137       |
| Appearance       |                    |                    |                    |      |             |
| Crust color      | 56.9               | 61.4               | 59.3               | 4.69 | 0.518       |
| Meat color       | 46.9               | 44.1               | 47.9               | 4.39 | 0.464       |
| Flavor           |                    |                    |                    |      |             |
| Overall          | 63.7               | 60.8               | 64.8               | 2.36 | 0.177       |
| Sweet            | 15.0               | 15.3               | 14.4               | 1.85 | 0.898       |
| Umami            | 27.8               | 26.2               | 26.6               | 3.13 | 0.716       |
| Chicken          | 56.1               | 54.0               | 56.6               | 2.24 | 0.353       |
| Roasted          | 48.6               | 45.0               | 48.9               | 3.99 | 0.364       |
| Greasy/oily      | 34.8               | 36.4               | 36.0               | 2.78 | 0.853       |
| Metallic         | 18.8 <sup>a</sup>  | 14.3 <sup>b</sup>  | 16.5 <sup>ab</sup> | 2.39 | 0.016       |
| Aftertaste       | 28.9 <sup>a</sup>  | 26.5 <sup>ab</sup> | 25.3 <sup>b</sup>  | 3.73 | 0.119       |
| Texture          |                    |                    |                    |      |             |
| Crispiness       | 29.8               | 28.1               | 38.6               | 5.69 | 0.123       |
| Firmness         | 42.9               | 50.3               | 40.2               | 5.44 | 0.135       |
| Juiciness        | 49.3 <sup>ab</sup> | 43.0 <sup>a</sup>  | 51.4 <sup>b</sup>  | 4.11 | 0.093       |
| Rubbery          | 34.2               | 39.8               | 32.0               | 4.71 | 0.235       |
| Greasy mouthfeel | 40.8               | 40.0               | 43.1               | 3.18 | 0.622       |

Mixed model: fixed effect feedstuff, random effects panelist, feedstuff\*panelist

<sup>a,b,c</sup> Means followed by differing superscript letters are statistically significantly different ( $\alpha=0.05$ ).

**Table S6.** Sensory estimated marginal mean attribute scores (standard error) and mixed model statistics (n=10, r=2) for all White Rock leg samples per feed (C=control, VC+ = high in vicin, VC- = low in vicin) group.

| Attribute   | Feed |      |      | SEM  | Feed effect |
|-------------|------|------|------|------|-------------|
|             | C    | VC+  | VC-  |      | p value     |
| Aroma       |      |      |      |      |             |
| Overall     | 62.9 | 62.0 | 58.9 | 2.83 | 0.297       |
| Roasted     | 47.8 | 48.8 | 44.1 | 3.59 | 0.350       |
| Chicken     | 46.3 | 45.3 | 45.7 | 3.13 | 0.903       |
| Barn        | 20.9 | 16.2 | 16.4 | 2.96 | 0.329       |
| Metallic    | 12.0 | 11.7 | 11.3 | 2.77 | 0.775       |
| Appearance  |      |      |      |      |             |
| Crust color | 48.3 | 43.2 | 45.6 | 6.03 | 0.552       |
| Meat color  | 39.5 | 37.5 | 35.8 | 4.76 | 0.568       |
| Flavor      |      |      |      |      |             |
| Overall     | 61.2 | 59.1 | 60.5 | 2.58 | 0.674       |
| Sweet       | 14.4 | 15.9 | 16.0 | 2.12 | 0.548       |

|                     |                   |                    |                   |      |       |
|---------------------|-------------------|--------------------|-------------------|------|-------|
| Umami               | 27.3              | 24.5               | 26.0              | 2.43 | 0.343 |
| Chicken             | 56.1              | 52.6               | 56.2              | 2.49 | 0.141 |
| Roasted             | 46.3              | 42.8               | 41.8              | 3.90 | 0.186 |
| Greasy/oily         | 38.9 <sup>a</sup> | 38.0 <sup>ab</sup> | 33.3 <sup>b</sup> | 1.97 | 0.075 |
| Metallic            | 18.3              | 17.2               | 15.1              | 2.60 | 0.164 |
| Aftertaste          | 26.4              | 26.7               | 24.6              | 3.36 | 0.456 |
| Texture             |                   |                    |                   |      |       |
| Crispiness          | 36.8 <sup>a</sup> | 30.8 <sup>ab</sup> | 24.0 <sup>b</sup> | 5.47 | 0.044 |
| Firmness            | 46.9              | 41.4               | 47.5              | 5.17 | 0.238 |
| Juiciness           | 46.3              | 48.3               | 48.8              | 3.56 | 0.644 |
| Rubbery             | 37.5              | 34.2               | 38.7              | 4.39 | 0.300 |
| Greasy<br>mouthfeel | 41.0              | 43.7               | 39.5              | 3.55 | 0.296 |

Mixed model: fixed effect feedstuff, random effects panelist, feedstuff\*panelist

<sup>a,b,c</sup> Means followed by differing superscript letters are statistically significantly different ( $\alpha=0.05$ ).
